# Supplementary material for: Computational analysis of energetic features and intermolecular interactions in protein-inhibitor USP7 complexes
Source: Royal Society of Chemistry journal article supplement (doi:10.1039/d4ob01953a), 2025-01-01
Supplement: d4ob01953a2.xlsx [file d4ob01953a2.xlsx]

## Sheet: Arkusz1
6vn3	AA	NO	Ees		6vn4	AA	NO	Ees		6f5h	AA	NO	Ees		6m1k	AA	NO	Ees		5n9t	AA	NO	Ees		5vs6	AA	NO	Ees		5whc	AA	NO	Ees		5uqv	AA	NO	Ees
	GLY	215	-0.0910612			GLY	215	0.0126673			GLY	215	-0.0702677			GLY	215	-0.107314			GLY	215	-0.0688337			GLY	215	-0.0265296			GLY	215	-0.162285			GLY	215	-0.13217
	LEU	216	0.210325			LEU	216	-0.0757648			LEU	216	0.0301147			LEU	216	0.168021			LEU	216	0.206501			LEU	216	0.0344168			LEU	216	0.362333			LEU	216	0.470124
	LYS	217	12.624			LYS	217	-0.0647706			LYS	217	11.0949			LYS	217	10.7562			LYS	217	9.87954			LYS	217	8.67328			LYS	217	10.4986			LYS	217	11.3533
	ASN	218	-0.718451			ASN	218	0.0313098			ASN	218	0.321463			ASN	218	0.376195			ASN	218	0.38934			ASN	218	-0.0262906			ASN	218	-0.040392			ASN	218	0.135755
	GLN	219	0.437859			GLN	219	0.00239006			GLN	219	-0.64914			GLN	219	-0.413002			GLN	219	-0.52175			GLN	219	-0.381692			GLN	219	-0.289436			GLN	219	-0.346797
	GLY	220	-1.12859			GLY	220	0.00382409			GLY	220	-0.522706			GLY	220	-0.50239			GLY	220	-0.180927			GLY	220	-0.288958			GLY	220	-0.0982314			GLY	220	-0.214388
	ALA	221	-1.67734			ALA	221	0.0967973			ALA	221	-0.368308			ALA	221	-1.06907			ALA	221	-0.443834			ALA	221	-0.154876			ALA	221	-0.396511			ALA	221	-0.554732
	THR	222	-1.90416			THR	222	0.247371			THR	222	-0.641491			THR	222	-1.31334			THR	222	-0.529876			THR	222	-0.171606			THR	222	-0.324331			THR	222	-0.547323
	CYS	223	-0.508365			CYS	223	-0.120937			CYS	223	-0.0279637			CYS	223	-0.174713			CYS	223	-0.365201			CYS	223	0.0444551			CYS	223	-0.116635			CYS	223	-0.173518
	TYR	224	1.75024			TYR	224	-2.337			TYR	224	0.319073			TYR	224	2.7653			TYR	224	-1.40416			TYR	224	-2.2077			TYR	224	-0.435946			TYR	224	-0.663241
	MET	225	1.41037			MET	225	-0.13456			MET	225	0.704828			MET	225	1.09058			MET	225	0.245937			MET	225	0.235182			MET	225	-0.141013			MET	225	0.0169694
	ASN	226	0.300908			ASN	226	0.134799			ASN	226	0.172084			ASN	226	-0.130975			ASN	226	-0.354924			ASN	226	0.0284417			ASN	226	-0.561424			ASN	226	-0.75
	SER	227	1.01625			SER	227	0.0695507			SER	227	0.378346			SER	227	0.788241			SER	227	0.272228			SER	227	0.335803			SER	227	-0.333891			SER	227	-0.44001
	LEU	228	1.47132			LEU	228	-0.226577			LEU	228	0.961759			LEU	228	1.1869			LEU	228	0.827916			LEU	228	0.349426			LEU	228	0.231836			LEU	228	0.717734
	LEU	229	0.934751			LEU	229	-0.0494742			LEU	229	0.54087			LEU	229	0.59608			LEU	229	0.321463			LEU	229	0.190966			LEU	229	0.0619025			LEU	229	0.146989
	GLN	230	0.547562			GLN	230	0.0552103			GLN	230	0.359704			GLN	230	0.113767			GLN	230	-0.0669216			GLN	230	0.0929732			GLN	230	-0.566444			GLN	230	-0.686185
	THR	231	0.849426			THR	231	-0.0504302			THR	231	0.584847			THR	231	0.57218			THR	231	0.380975			THR	231	0.226099			THR	231	-0.113767			THR	231	0.10086
	LEU	232	1.01482			LEU	232	-0.156788			LEU	232	0.731358			LEU	232	0.959608			LEU	232	0.827916			LEU	232	0.393881			LEU	232	0.693356			LEU	232	1.46033
	PHE	233	0.340105			PHE	233	-0.0105163			PHE	233	0.237811			PHE	233	0.199809			PHE	233	0.112094			PHE	233	0.0807839			PHE	233	-0.0673996			PHE	233	-0.0119503
	PHE	234	0.212476			PHE	234	0.0327438			PHE	234	0.141252			PHE	234	0.0157744			PHE	234	-0.0640535			PHE	234	0.00573614			PHE	234	-0.402964			PHE	234	-0.41348
	THR	235	0.313576			THR	235	-0.0322658			THR	235	0.210564			THR	235	0.239006			THR	235	0.395793			THR	235	0.125239			THR	235	0.0260516			THR	235	0.178298
	ASN	236	-0.193595			ASN	236	0.0258126			ASN	236	-0.146033			ASN	236	-0.23327			ASN	236	-0.189771			ASN	236	-0.0855641			ASN	236	-0.70913			ASN	236	-0.630497
	GLN	237	-0.138384			GLN	237	-0.00645315			GLN	237	0.00215105			GLN	237	-0.0791109			GLN	237	-0.0590344			GLN	237	-0.138862			GLN	237	-0.081979			GLN	237	-0.0650096
	LEU	238	0.31262			LEU	238	-0.0688337			LEU	238	0.286568			LEU	238	0.42543			LEU	238	0.435468			LEU	238	0.250956			LEU	238	0.575765			LEU	238	1.10684
	ARG	239	12.3838			ARG	239	-0.668738			ARG	239	11.5158			ARG	239	12.8509			ARG	239	12.3253			ARG	239	9.73924			ARG	239	16.1033			ARG	239	17.663
	LYS	240	9.87476			LYS	240	-0.482553			LYS	240	9.55282			LYS	240	10.7847			LYS	240	10.6331			LYS	240	8.51506			LYS	240	14.479			LYS	240	15.0067
	ALA	241	0.0121893			ALA	241	-0.0193595			ALA	241	0.0583174			ALA	241	0.0700287			ALA	241	0.10827			ALA	241	0.0640535			ALA	241	-0.0203155			ALA	241	0.160134
	VAL	242	0.31979			VAL	242	-0.0497132			VAL	242	0.28848			VAL	242	0.38934			VAL	242	0.375717			VAL	242	0.207218			VAL	242	0.640774			VAL	242	0.895315
	TYR	243	0.157027			TYR	243	-0.0184034			TYR	243	0.17065			TYR	243	0.172562			TYR	243	0.176386			TYR	243	0.112811			TYR	243	0.157505			TYR	243	0.231119
	MET	244	0.13217			MET	244	-0.0241396			MET	244	0.209608			MET	244	0.171128			MET	244	0.206262			MET	244	0.101816			MET	244	0.236616			MET	244	0.318834
	MET	245	0.00262906			MET	245	-0.000717017			MET	245	-0.0215105			MET	245	-0.0112333			MET	245	-0.0043021			MET	245	0.111377			MET	245	-0.246176			MET	245	-0.0776769
	PRO	246	-0.0726577			PRO	246	0.00239006			PRO	246	-0.0129063			PRO	246	0.0258126			PRO	246	-0.00764818			PRO	246	-0.0523423			PRO	246	0.139818			PRO	246	0.0640535
	THR	247	0.233509			THR	247	-0.0286807			THR	247	0.207935			THR	247	0.270793			THR	247	0.270076			THR	247	0.156071			THR	247	0.296367			THR	247	0.646272
	GLU	248	-9.18786			GLU	248	0.307122			GLU	248	-8.20387			GLU	248	-9.576			GLU	248	-8.64197			GLU	248	-7.80043			GLU	248	-14.1848			GLU	248	-13.2519
	GLY	249	-0.0640535			GLY	249	-0.00478011			GLY	249	-0.081262			GLY	249	-0.0494742			GLY	249	-0.0260516			GLY	249	-0.0365679			GLY	249	0.0289197			GLY	249	0.0566444
	ASP	250	-11.0189			ASP	250	0.381214			ASP	250	-10.0915			ASP	250	-11.191			ASP	250	-10.6769			ASP	250	-8.68595			ASP	250	-16.9548			ASP	250	-15.5566
	ASP	251	-11.2347			ASP	251	0.258604			ASP	251	-10.2964			ASP	251	-10.8023			ASP	251	-10.1463			ASP	251	-8.59297			ASP	251	-13.9175			ASP	251	-13.2842
	SER	252	-0.29804			SER	252	0.00286807			SER	252	-0.267686			SER	252	-0.271033			SER	252	-0.200765			SER	252	-0.17782			SER	252	-0.15153			SER	252	-0.150096
	SER	253	-0.486855			SER	253	0.0107553			SER	253	-0.303059			SER	253	-0.373327			SER	253	-0.262667			SER	253	-0.196463			SER	253	-0.292304			SER	253	-0.36783
	LYS	254	12.6245			LYS	254	-0.17304			LYS	254	10.0196			LYS	254	10.7354			LYS	254	10.2849			LYS	254	10.1955			LYS	254	13.6855			LYS	254	12.5062
	SER	255	-0.374044			SER	255	0.0334608			SER	255	-0.275574			SER	255	-0.331023			SER	255	-0.272228			SER	255	-0.145315			SER	255	-0.32457			SER	255	-0.514101
	VAL	256	0.169455			VAL	256	-0.00191205			VAL	256	0.20674			VAL	256	0.20913			VAL	256	0.205306			VAL	256	0.121893			VAL	256	0.347992			VAL	256	0.138384
	PRO	257	0.0607075			PRO	257	-0.0040631			PRO	257	0.119025			PRO	257	0.220841			PRO	257	0.188576			PRO	257	0.106836			PRO	257	0.97108			PRO	257	0.661807
	LEU	258	-0.198375			LEU	258	0.0176864			LEU	258	-0.162763			LEU	258	-0.149857			LEU	258	-0.108987			LEU	258	-0.0760038			LEU	258	0.0523423			LEU	258	-0.0805449
	ALA	259	-0.136472			ALA	259	0.0126673			ALA	259	-0.0573614			ALA	259	-0.0554493			ALA	259	-0.043499			ALA	259	-0.0372849			ALA	259	0.123327			ALA	259	-0.041826
	LEU	260	0.365201			LEU	260	-0.0492352			LEU	260	0.341061			LEU	260	0.443834			LEU	260	0.379063			LEU	260	0.201243			LEU	260	0.924474			LEU	260	0.91348
	GLN	261	0.0174474			GLN	261	-0.0274857			GLN	261	0.0360899			GLN	261	0.123805			GLN	261	0.181405			GLN	261	0.081979			GLN	261	0.796845			GLN	261	0.599665
	ARG	262	12.4823			ARG	262	-0.363767			ARG	262	10.772			ARG	262	11.7713			ARG	262	10.9369			ARG	262	8.95268			ARG	262	14.6702			ARG	262	14.8611
	VAL	263	0.367352			VAL	263	-0.0210325			VAL	263	0.217256			VAL	263	0.273423			VAL	263	0.185946			VAL	263	0.11783			VAL	263	0.370937			VAL	263	0.363767
	PHE	264	0.516252			PHE	264	-0.0705067			PHE	264	0.380497			PHE	264	0.553059			PHE	264	0.487094			PHE	264	0.270076			PHE	264	0.93021			PHE	264	1.07696
	TYR	265	0.10588			TYR	265	-0.0136233			TYR	265	0.0638145			TYR	265	0.123088			TYR	265	0.135755			TYR	265	0.0523423			TYR	265	0.391969			TYR	265	0.349187
	GLU	266	-11.7961			GLU	266	0.257887			GLU	266	-10.729			GLU	266	-10.6446			GLU	266	-10.2373			GLU	266	-8.39269			GLU	266	-11.771			GLU	266	-12.5086
	LEU	267	0.476816			LEU	267	-0.0262906			LEU	267	0.344168			LEU	267	0.393164			LEU	267	0.32457			LEU	267	0.198375			LEU	267	0.37022			LEU	267	0.486138
	GLN	268	-0.0100382			GLN	268	-0.00621415			GLN	268	-0.0229446			GLN	268	0.0105163			GLN	268	-0.00143403			GLN	268	0.00143403			GLN	268	0.0487572			GLN	268	0.0934512
	HIS	269	0.0384799			HIS	269	-0.0150574			HIS	269	0.00717017			HIS	269	0.323853			HIS	269	0.298996			HIS	269	-0.0215105			HIS	269	0.204589			HIS	269	0.15631
	SER	270	0.0726577			SER	270	-0.00956023			SER	270	0.0248566			SER	270	0.0783939			SER	270	0.0604685			SER	270	0.0131453			SER	270	0.155593			SER	270	0.101338
	ASP	271	-10.0086			ASP	271	0.124522			ASP	271	-9.24235			ASP	271	-9.27701			ASP	271	-8.69814			ASP	271	-7.67113			ASP	271	-9.61018			ASP	271	-10.354
	LYS	272	9.62811			LYS	272	-0.00932122			LYS	272	9.01052			LYS	272	8.84871			LYS	272	8.05688			LYS	272	7.41826			LYS	272	8.79732			LYS	272	9.39245
	PRO	273	0.0176864			PRO	273	0.0157744			PRO	273	0.0936902			PRO	273	0.0370459			PRO	273	-0.00310707			PRO	273	0.0504302			PRO	273	-0.130975			PRO	273	-0.114245
	VAL	274	-0.346558			VAL	274	-0.00669216			VAL	274	-0.229685			VAL	274	-0.195746			VAL	274	-0.123327			VAL	274	-0.106597			VAL	274	-0.0150574			VAL	274	-0.00382409
	GLY	275	-0.236855			GLY	275	0.0289197			GLY	275	-0.16587			GLY	275	-0.222036			GLY	275	-0.206262			GLY	275	-0.117352			GLY	275	-0.303059			GLY	275	-0.333891
	THR	276	-0.158939			THR	276	0.00764818			THR	276	-0.109465			THR	276	-0.241874			THR	276	-0.160612			THR	276	-0.109704			THR	276	-0.0341778			THR	276	-0.188576
	LYS	277	14.2051			LYS	277	0.081501			LYS	277	12.3461			LYS	277	12.2328			LYS	277	10.5017			LYS	277	10.1441			LYS	277	11.0158			LYS	277	12.5351
	LYS	278	11.5289			LYS	278	-0.181166			LYS	278	10.3683			LYS	278	10.5253			LYS	278	9.9087			LYS	278	8.40392			LYS	278	11.9931			LYS	278	12.174
	LEU	279	-0.302103			LEU	279	-0.0138623			LEU	279	-0.237333			LEU	279	-0.148184			LEU	279	-0.145554			LEU	279	-0.0929732			LEU	279	-0.180449			LEU	279	-0.0207935
	THR	280	0.155115			THR	280	-0.00215105			THR	280	0.082935			THR	280	0.185229			THR	280	0.0494742			THR	280	0.0229446			THR	280	-0.00525813			THR	280	0.17543
	LYS	281	13.7249			LYS	281	-0.138145			LYS	281	11.5686			LYS	281	12.3872			LYS	281	10.6372			LYS	281	9.46104			LYS	281	12.2576			LYS	281	12.5048
	SER	282	-0.126434			SER	282	0.0368069			SER	282	-0.13217			SER	282	-0.262667			SER	282	-0.312859			SER	282	-0.158939			SER	282	-0.777008			SER	282	-0.554493
	PHE	283	-0.137667			PHE	283	-0.0375239			PHE	283	-0.157266			PHE	283	-0.0755258			PHE	283	-0.08413			PHE	283	-0.106836			PHE	283	0.0860421			PHE	283	0.161568
	GLY	284	-0.652725			GLY	284	-0.0255736			GLY	284	-0.400096			GLY	284	-0.302103			GLY	284	-0.21869			GLY	284	-0.197419			GLY	284	0.0597514			GLY	284	0.0659656
	TRP	285	0.633843			TRP	285	-0.202438			TRP	285	0.532266			TRP	285	0.927103			TRP	285	0.940249			TRP	285	0.327677			TRP	285	1.08556			TRP	285	1.10636
	GLU	286	-18.1185			GLU	286	0.0141013			GLU	286	-14.5798			GLU	286	-14.0741			GLU	286	-12.4919			GLU	286	-10.7569			GLU	286	-13.2383			GLU	286	-13.8489
	THR	287	-1.89794			THR	287	-0.0611855			THR	287	-0.632648			THR	287	-0.438098			THR	287	-0.601816			THR	287	-0.39412			THR	287	-0.084847			THR	287	-0.1924
	LEU	288	-2.44742			LEU	288	-0.0920172			LEU	288	-1.00741			LEU	288	-0.927103			LEU	288	-0.777964			LEU	288	-0.335564			LEU	288	-0.296128			LEU	288	-0.400574
	ASP	289	-34.3542			ASP	289	-1.00645			ASP	289	-23.8317			ASP	289	-19.5633			ASP	289	-17.6728			ASP	289	-15.6035			ASP	289	-13.3021			ASP	289	-14.5715
	SER	290	-2.31907			SER	290	0.0382409			SER	290	-1.21463			SER	290	-1.40989			SER	290	-1.07075			SER	290	-0.415392			SER	290	-0.713193			SER	290	-0.875239
	PHE	291	-8.00215			PHE	291	-0.308795			PHE	291	-2.78537			PHE	291	-2.61377			PHE	291	-1.6109			PHE	291	-0.887906			PHE	291	-0.123327			PHE	291	-0.25478
	MET	292	-24.3184			MET	292	-0.933795			MET	292	-1.31501			MET	292	-0.450765			MET	292	-0.820985			MET	292	-0.133604			MET	292	0.0317878			MET	292	-0.00669216
	GLN	293	-6.88791			GLN	293	0.0638145			GLN	293	-1.788			GLN	293	-1.76984			GLN	293	-1.2108			GLN	293	-0.768164			GLN	293	-1.01171			GLN	293	-1.17686
	HIS	294	-13.6463			HIS	294	0.0528203			HIS	294	-2.3272			HIS	294	-2.79637			HIS	294	-2.08461			HIS	294	-0.326004			HIS	294	-0.478011			HIS	294	-0.150813
	ASP	295	-82.831			ASP	295	-9.56214			ASP	295	-75.7139			ASP	295	-49.4704			ASP	295	-62.4598			ASP	295	-18.6085			ASP	295	-23.2041			ASP	295	-31.2168
	VAL	296	-5.0858			VAL	296	-4.60946			VAL	296	-4.32266			VAL	296	-9.00167			VAL	296	-4.72514			VAL	296	-4.53131			VAL	296	-1.61185			VAL	296	-2.97275
	GLN	297	-13.3573			GLN	297	-18.9156			GLN	297	-2.04063			GLN	297	0.815249			GLN	297	0.327916			GLN	297	-10.8289			GLN	297	-0.380736			GLN	297	-9.57409
	GLU	298	-38.4094			GLU	298	2.4522			GLU	298	-34.9826			GLU	298	-35.4252			GLU	298	-35.1924			GLU	298	-18.935			GLU	298	-25.7469			GLU	298	-29.8829
	LEU	299	2.20674			LEU	299	-0.239723			LEU	299	1.14316			LEU	299	0.873327			LEU	299	0.536807			LEU	299	0.0879541			LEU	299	-1.58007			LEU	299	-1.78059
	CYS	300	1.92925			CYS	300	-0.538719			CYS	300	1.34297			CYS	300	1.54613			CYS	300	1.43045			CYS	300	0.2837			CYS	300	-4.18451			CYS	300	-3.2347
	ARG	301	20.2902			ARG	301	-3.81142			ARG	301	25.7478			ARG	301	45.3877			ARG	301	30.1864			ARG	301	20.9847			ARG	301	31.5598			ARG	301	44.2655
	VAL	302	1.32027			VAL	302	-0.146033			VAL	302	0.955306			VAL	302				VAL	302	1.00454			VAL	302	0.382648			VAL	302	-1.15225			VAL	302	-0.331979
	LEU	303	1.16539			LEU	303	-0.114245			LEU	303	0.761472			LEU	303	0.731119			LEU	303	0.557361			LEU	303	0.226099			LEU	303	-2.16013			LEU	303	-1.2022
	LEU	304	0.771033			LEU	304	-0.178537			LEU	304	0.607075			LEU	304	0.811185			LEU	304	0.729207			LEU	304	0.239245			LEU	304	-7.03418			LEU	304	-2.47945
	ASP	305	-16.8332			ASP	305	1.32792			ASP	305	-14.4264			ASP	305	-21.2283			ASP	305	-21.1386			ASP	305	-14.153			ASP	305	-67.6011			ASP	305	-46.271
	ASN	306	1.15511			ASN	306	-0.122132			ASN	306	0.931405			ASN	306	1.14412			ASN	306	1.09512			ASN	306	0.505975			ASN	306	1.83365			ASN	306	2.62476
	VAL	307	0.531788			VAL	307	-0.0544933			VAL	307	0.35325			VAL	307	0.402725			VAL	307	0.353489			VAL	307	0.170172			VAL	307	-0.145315			VAL	307	0.614962
	GLU	308	-13.3946			GLU	308	1.02079			GLU	308	-12.9919			GLU	308	-17.136			GLU	308	-14.6453			GLU	308	-12.3239			GLU	308	-40.3688			GLU	308	-33.0619
	ASN	309	0.639579			ASN	309	-0.0552103			ASN	309	0.207457			ASN	309	0.755975			ASN	309	0.630736			ASN	309	0.356836			ASN	309	4.34704			ASN	309	3.59202
	LYS	310	11.3817			LYS	310	-0.49283			LYS	310	10.581			LYS	310	12.1243			LYS	310	11.7443			LYS	310	9.30258			LYS	310	21.8717			LYS	310	19.5676
	MET	311	0.261233			MET	311	-0.0157744			MET	311	0.201243			MET	311	0.234226			MET	311	0.151291			MET	311	0.0740918			MET	311	0.449092			MET	311	0.686663
	LYS	312	12.2988			LYS	312	-0.740918			LYS	312	11.4771			LYS	312	14.0894			LYS	312	12.3525			LYS	312	11.6785			LYS	312	41.0989			LYS	312	29.7141
	GLY	313	0.129541			GLY	313	-0.0126673			GLY	313	0.12978			GLY	313	0.231597			GLY	313	0.240201			GLY	313	0.169216			GLY	313	0.948136			GLY	313	0.546606
	THR	314	0.0714627			THR	314	0.00310707			THR	314	0.0358509			THR	314	0.0131453			THR	314	0.0184034			THR	314	0.0265296			THR	314	0.206979			THR	314	0.041109
	CYS	315	-0.0262906			CYS	315	0.00860421			CYS	315	-0.160612			CYS	315	-0.180449			CYS	315	-0.140296			CYS	315	-0.0963193			CYS	315	-0.560946			CYS	315	-0.568834
	VAL	316	-0.189771			VAL	316	0.0277247			VAL	316	-0.186424			VAL	316	-0.301147			VAL	316	-0.313337			VAL	316	-0.198614			VAL	316	-1.27844			VAL	316	-1.05425
	GLU	317	-10.2679			GLU	317	0.587954			GLU	317	-9.86831			GLU	317	-12.4046			GLU	317	-12.3193			GLU	317	-9.86568			GLU	317	-25.8936			GLU	317	-20.9639
	GLY	318	-0.0580784			GLY	318	0.0270076			GLY	318	-0.0506692			GLY	318	-0.125239			GLY	318	-0.171128			GLY	318	-0.107553			GLY	318	0.478967			GLY	318	-0.126195
	THR	319	-0.190249			THR	319	0.0470841			THR	319	-0.191922			THR	319	-0.354446			THR	319	-0.391969			THR	319	-0.220841			THR	319	-0.497849			THR	319	-0.873327
	ILE	320	-0.0267686			ILE	320	0.0518642			ILE	320	-0.112094			ILE	320	-0.344646			ILE	320	-0.412763			ILE	320	-0.227055			ILE	320	0.665631			ILE	320	-2.32457
	PRO	321	0.0389579			PRO	321	-0.185229			PRO	321	0.0444551			PRO	321	0.081979			PRO	321	-0.0265296			PRO	321	-0.043499			PRO	321	3.05497			PRO	321	0.193595
	LYS	322	10.365			LYS	322	-0.648184			LYS	322	10.1116			LYS	322	12.9512			LYS	322	12.6324			LYS	322	9.92017			LYS	322	22.8062			LYS	322	20.3693
	LEU	323	-0.271511			LEU	323	0.0860421			LEU	323	-0.329828			LEU	323	-0.607792			LEU	323	-0.677342			LEU	323	-0.371893			LEU	323	-0.0530593			LEU	323	-0.853011
	PHE	324	-0.0889101			PHE	324	0.0623805			PHE	324	-0.233987			PHE	324	-0.820746			PHE	324	-0.974426			PHE	324	-0.528442			PHE	324	-0.484943			PHE	324	-0.417304
	ARG	325	13.0793			ARG	325	-1.07266			ARG	325	12.674			ARG	325	18.5609			ARG	325	18.6487			ARG	325	13.9022			ARG	325	36.6391			ARG	325	30.5889
	GLY	326	0.10588			GLY	326	-0.0544933			GLY	326	0.0972753			GLY	326	-0.00621415			GLY	326	0.039675			GLY	326	-0.163002			GLY	326	0.219885			GLY	326	0.804971
	LYS	327	11.163			LYS	327	-0.795172			LYS	327	11.8793			LYS	327	16.5425			LYS	327	17.7283			LYS	327	13.1154			LYS	327	22.2765			LYS	327	23.152
	MET	328	0.0700287			MET	328	-0.0315488			MET	328	-0.00167304			MET	328	-0.947658			MET	328	-0.602294			MET	328	-0.892447			MET	328	0.614245			MET	328	1.16444
	VAL	329	-0.202438			VAL	329	0.0160134			VAL	329	-0.252629			VAL	329	-0.677342			VAL	329	-0.51912			VAL	329	-0.790392			VAL	329	0.146272			VAL	329	0.0678776
	SER	330	0.196224			SER	330	-0.0334608			SER	330	0.160134			SER	330	0.649618			SER	330	0.461281			SER	330	0.705067			SER	330	0.407505			SER	330	0.273184
	TYR	331	-0.0219885			TYR	331	-0.0236616			TYR	331	-0.100143			TYR	331	0.0193595			TYR	331	-0.0109943			TYR	331	-0.155593			TYR	331	0.0494742			TYR	331	0.147945
	ILE	332	0.281788			ILE	332	-0.0124283			ILE	332	0.339149			ILE	332	0.568117			ILE	332	0.600382			ILE	332	0.846797			ILE	332	0.319551			ILE	332	0.336281
	GLN	333	-0.0351338			GLN	333	0.000478011			GLN	333	-0.0489962			GLN	333	-0.00979924			GLN	333	0.0114723			GLN	333	-0.0478011			GLN	333	-0.00693117			GLN	333	0.0124283
	CYS	334	0.083413			CYS	334	-0.00764818			CYS	334	0.0862811			CYS	334	0.21869			CYS	334	0.232553			CYS	334	0.245459			CYS	334	0.0454111			CYS	334	0.169694
	LYS	335	9.13767			LYS	335	-0.18021			LYS	335	10.1104			LYS	335	12.6025			LYS	335	12.6637			LYS	335	14.9878			LYS	335	9.85875			LYS	335	9.99498
	GLU	336	-7.59967			GLU	336	0.146272			GLU	336	-8.54302			GLU	336	-9.59775			GLU	336	-10.376			GLU	336	-10.6879			GLU	336	-8.33461			GLU	336	-8.48757
	VAL	337	-0.0351338			VAL	337	0.00860421			VAL	337	-0.0444551			VAL	337	-0.0858031			VAL	337	-0.116874			VAL	337	-0.115679			VAL	337	-0.123566			VAL	337	-0.0941683
	ASP	338	-7.86042			ASP	338	0.246654			ASP	338	-8.44766			ASP	338	-10.3688			ASP	338	-10.6936			ASP	338	-11.2342			ASP	338	-9.55903			ASP	338	-9.28585
	TYR	339	-0.108031			TYR	339	0.00788719			TYR	339	-0.199809			TYR	339	-0.15392			TYR	339	-0.381692			TYR	339	-0.220124			TYR	339	-0.233509			TYR	339	-0.229924
	ARG	340	9.56142			ARG	340	-0.410134			ARG	340	10.495			ARG	340	13.5626			ARG	340	14.4644			ARG	340	14.8339			ARG	340	11.8554			ARG	340	11.7968
	SER	341	-0.128824			SER	341	0.0236616			SER	341	-0.0788719			SER	341	-0.336998			SER	341	-0.225621			SER	341	-0.38695			SER	341	-0.402725			SER	341	-0.389101
	ASP	342	-10.3767			ASP	342	0.503346			ASP	342	-11.2624			ASP	342	-15.1446			ASP	342	-16.1539			ASP	342	-15.8038			ASP	342	-14.1066			ASP	342	-13.6298
	ARG	343	13.5629			ARG	343	-0.537524			ARG	343	15.1073			ARG	343	20.9486			ARG	343	24.1138			ARG	343	22.1061			ARG	343	16.1702			ARG	343	16.9589
	ARG	344	10.3095			ARG	344	-0.763384			ARG	344	10.5127			ARG	344	14.88			ARG	344	15.7581			ARG	344	15.434			ARG	344	21.892			ARG	344	18.7729
	GLU	345	-15.1343			GLU	345	1.07051			GLU	345	-16.538			GLU	345	-28.5399			GLU	345	-30.7894			GLU	345	-25.3865			GLU	345	-23.945			GLU	345	-23.7694
	ASP	346	-13.8437			ASP	346	1.20435			ASP	346	-14.2299			ASP	346	-22.5727			ASP	346	-23.5657			ASP	346	-17.2108			ASP	346	-32.9637			ASP	346	-29.1575
	TYR	347	-0.00501912			TYR	347	0.0224665			TYR	347	0.0960803			TYR	347	0.673518			TYR	347	0.833652			TYR	347	0.551625			TYR	347	-1.04469			TYR	347	-1.38026
	TYR	348	-0.176386			TYR	348	0.16826			TYR	348	-0.166109			TYR	348	0.373327			TYR	348	0.753585			TYR	348	0.344168			TYR	348	-9.66228			TYR	348	-15.4261
	ASP	349	-22.8769			ASP	349	4.45459			ASP	349	-22.652			ASP	349	-43.0327			ASP	349	-44.9252			ASP	349	-20.7576			ASP	349	-39.9496			ASP	349	-61.8707
	ILE	350	-1.1054			ILE	350	0.809273			ILE	350	-0.891252			ILE	350	-1.38217			ILE	350	-1.5153			ILE	350	-0.0372849			ILE	350	0.305688			ILE	350	-0.0944073
	GLN	351	0.979685			GLN	351	-2.60755			GLN	351	0.128107			GLN	351	-6.41683			GLN	351	-10.7794			GLN	351	-4.29422			GLN	351	2.12667			GLN	351	2.84847
	LEU	352	-0.612811			LEU	352	0.180449			LEU	352	-1.07553			LEU	352	-0.270793			LEU	352	-0.0714627			LEU	352	-0.901052			LEU	352	0.516491			LEU	352	0.702677
	SER	353	0.348709			SER	353	-0.110421			SER	353	0.948853			SER	353	1.68762			SER	353	2.00167			SER	353	1.6195			SER	353	0.401769			SER	353	0.394837
	ILE	354	0.837476			ILE	354	-0.265296			ILE	354	1.09799			ILE	354	1.11759			ILE	354	1.09536			ILE	354	0.653442			ILE	354	0.43499			ILE	354	0.612333
	LYS	355	17.8831			LYS	355	0.627629			LYS	355	22.9199			LYS	355	17.0734			LYS	355	18.6126			LYS	355	20.7383			LYS	355	11.4025			LYS	355	12.7799
	GLY	356	0.368308			GLY	356	0.0621415			GLY	356	0.556644			GLY	356	0.190488			GLY	356	0.194073			GLY	356	0.329111			GLY	356	0.0489962			GLY	356	0.0994264
	LYS	357	16.4185			LYS	357	-0.68499			LYS	357	19.7519			LYS	357	22.2084			LYS	357	22.4833			LYS	357	25.7072			LYS	357	12.6496			LYS	357	14.2204
	LYS	358	11.2796			LYS	358	-0.183317			LYS	358	12.739			LYS	358	13.0511			LYS	358	13.1193			LYS	358	15.1926			LYS	358	9.70793			LYS	358	10.8497
	ASN	359	-0.432122			ASN	359	0.146511			ASN	359	-0.548757			ASN	359	-0.952438			ASN	359	-0.990201			ASN	359	-0.776291			ASN	359	-0.498805			ASN	359	-0.615201
	ILE	360	0.232075			ILE	360	-0.00717017			ILE	360	0.229924			ILE	360	-0.171367			ILE	360	-0.136233			ILE	360	-0.323136			ILE	360	0.0188815			ILE	360	0.109943
	PHE	361	-0.246176			PHE	361	0.0544933			PHE	361	-0.277008			PHE	361	-0.565727			PHE	361	-0.5674			PHE	361	-0.677103			PHE	361	-0.212954			PHE	361	-0.240679
	GLU	362	-13.1577			GLU	362	0.58652			GLU	362	-15.0222			GLU	362	-16.2622			GLU	362	-16.8372			GLU	362	-17.3884			GLU	362	-11.3975			GLU	362	-12.8948
	SER	363	0.0353728			SER	363	0.0107553			SER	363	0.0222275			SER	363	-0.607553			SER	363	-0.918738			SER	363	-0.720602			SER	363	-0.257887			SER	363	-0.262428
	PHE	364	0.271272			PHE	364	-0.106119			PHE	364	0.18738			PHE	364	0.0922562			PHE	364	0.0728967			PHE	364	-0.545889			PHE	364	0.361616			PHE	364	0.527486
	VAL	365	-0.105402			VAL	365	0.00478011			VAL	365	-0.17782			VAL	365	-0.497132			VAL	365	-0.535612			VAL	365	-0.849187			VAL	365	-0.125956			VAL	365	-0.0889101
	ASP	366	-15.6482			ASP	366	0.943595			ASP	366	-18.0495			ASP	366	-23.408			ASP	366	-23.5244			ASP	366	-28.2278			ASP	366	-13.4909			ASP	366	-15.3597
	TYR	367	0.181644			TYR	367	-0.187859			TYR	367	0.646272			TYR	367	1.19575			TYR	367	1.38743			TYR	367	-1.13862			TYR	367	0.145554			TYR	367	0.546845
	VAL	368	0.20196			VAL	368	-0.0700287			VAL	368	0.253107			VAL	368	0.455306			VAL	368	0.534656			VAL	368	0.124522			VAL	368	0.322897			VAL	368	0.427581
	ALA	369	0.0117113			ALA	369	-0.0205545			ALA	369	0.0611855			ALA	369	-0.101338			ALA	369	-0.0630975			ALA	369	-0.38934			ALA	369	-0.0719407			ALA	369	-0.0329828
	VAL	370	-0.119981			VAL	370	-0.0133843			VAL	370	-0.199092			VAL	370	-0.269837			VAL	370	-0.0994264			VAL	370	-0.514818			VAL	370	0.0248566			VAL	370	0.0143403
	GLU	371	-13.0098			GLU	371	0.403442			GLU	371	-15.283			GLU	371	-20.5112			GLU	371	-19.8337			GLU	371	-29.2125			GLU	371	-12.7232			GLU	371	-13.5337
	GLN	372	-0.0683556			GLN	372	0.0083652			GLN	372	-0.0678776			GLN	372	-0.104207			GLN	372	-0.00764818			GLN	372	-0.27653			GLN	372	-0.0231836			GLN	372	0.0623805
	LEU	373	0.28131			LEU	373	-0.0195985			LEU	373	0.394837			LEU	373	0.62978			LEU	373	0.647706			LEU	373	0.982792			LEU	373	0.332935			LEU	373	0.365918
	ASP	374	-9.7598			ASP	374	0.143642			ASP	374	-11.2691			ASP	374	-13.1685			ASP	374	-13.1597			ASP	374	-16.5158			ASP	374	-9.59967			ASP	374	-9.86209
	GLY	375	-0.0461281			GLY	375	-0.0043021			GLY	375	-0.0262906			GLY	375	-0.0724187			GLY	375	-0.0341778			GLY	375	-0.0757648			GLY	375	-0.0705067			GLY	375	-0.0585564
	ASP	376	-10.0717			ASP	376	0.0239006			ASP	376	-11.4006			ASP	376	-12.5014			ASP	376	-12.3109			ASP	376	-15.6408			ASP	376	-9.80569			ASP	376	-9.84728
	ASN	377	0.167543			ASN	377	0.0296367			ASN	377	0.226816			ASN	377	0.00239006			ASN	377	-0.313815			ASN	377	0.333413			ASN	377	-0.0380019			ASN	377	-0.0946463
	LYS	378	8.62452			LYS	378	-0.0934512			LYS	378	9.73948			LYS	378	11.1773			LYS	378	11.2106			LYS	378	13.327			LYS	378	8.71104			LYS	378	8.7512
	TYR	379	0.169694			TYR	379	-0.00525813			TYR	379	0.285612			TYR	379	0.358031			TYR	379	0.338432			TYR	379	0.394359			TYR	379	0.141969			TYR	379	0.0963193
	ASP	380	-9.81453			ASP	380	0.207457			ASP	380	-10.6231			ASP	380	-12.8152			ASP	380	-13.2232			ASP	380	-14.7457			ASP	380	-10.7794			ASP	380	-10.5975
	ALA	381	0.111855			ALA	381	-0.000478011			ALA	381	0.142925			ALA	381	0.196463			ALA	381	0.186902			ALA	381	0.318356			ALA	381	0.0525813			ALA	381	0.0576004
	GLY	382	0.156549			GLY	382	-0.0081262			GLY	382	0.183078			GLY	382	0.281549			GLY	382	0.292782			GLY	382	0.359943			GLY	382	0.215344			GLY	382	0.207935
	GLU	383	-7.59632			GLU	383	0.169694			GLU	383	-8.19694			GLU	383	-9.41826			GLU	383	-10.0602			GLU	383	-10.4309			GLU	383	-8.87261			GLU	383	-8.53083
	HIS	384	0.0946463			HIS	384	-0.00693117			HIS	384	-0.0630975			HIS	384	0.223709			HIS	384	-0.00645315			HIS	384	0.159417			HIS	384	0.266969			HIS	384	0.212476
	GLY	385	-0.101816			GLY	385	0.00382409			GLY	385	-0.146272			GLY	385	-0.196463			GLY	385	-0.199092			GLY	385	-0.275335			GLY	385	-0.0860421			GLY	385	-0.114245
	LEU	386	0.111855			LEU	386	-0.00310707			LEU	386	0.135994			LEU	386	0.134082			LEU	386	0.124522			LEU	386	0.201482			LEU	386	0.0798279			LEU	386	0.0693117
	GLN	387	-0.176864			GLN	387	0.00525813			GLN	387	-0.237094			GLN	387	-0.325765			GLN	387	-0.32935			GLN	387	-0.476099			GLN	387	-0.113767			GLN	387	-0.19957
	GLU	388	-8.72849			GLU	388	0.154398			GLU	388	-9.8272			GLU	388	-11.5122			GLU	388	-11.7251			GLU	388	-13.7242			GLU	388	-9.06119			GLU	388	-9.2457
	ALA	389	-0.123088			ALA	389	0.0100382			ALA	389	-0.103728			ALA	389	-0.19718			ALA	389	-0.189771			ALA	389	-0.32935			ALA	389	-0.0652486			ALA	389	-0.106597
	GLU	390	-9.98518			GLU	390	0.364006			GLU	390	-11.0908			GLU	390	-14.1876			GLU	390	-14.5031			GLU	390	-16.8418			GLU	390	-10.9247			GLU	390	-11.2452
	LYS	391	13.9974			LYS	391	-0.530593			LYS	391	15.7426			LYS	391	24.4493			LYS	391	24.6525			LYS	391	32.3119			LYS	391	15.3927			LYS	391	15.0445
	GLY	392	-0.114962			GLY	392	0.0267686			GLY	392	-0.0798279			GLY	392	-0.24522			GLY	392	-0.435229			GLY	392	-0.128585			GLY	392	-0.302581			GLY	392	-0.299474
	VAL	393	0.286568			VAL	393	-0.0243786			VAL	393	0.393164			VAL	393	0.979446			VAL	393	1.06573			VAL	393	1.09058			VAL	393	0.284656			VAL	393	0.408461
	LYS	394	10.3167			LYS	394	-0.669933			LYS	394	11.1637			LYS	394	15.403			LYS	394	16.0454			LYS	394	18.6298			LYS	394	13.2127			LYS	394	13.0734
	PHE	395	0.527486			PHE	395	-0.111138			PHE	395	0.587954			PHE	395	1.12189			PHE	395	1.24355			PHE	395	0.827677			PHE	395	0.435946			PHE	395	0.713193
	LEU	396	0.153203			LEU	396	-0.00621415			LEU	396	0.199809			LEU	396	0.479446			LEU	396	0.563098			LEU	396	0.564293			LEU	396	0.263623			LEU	396	0.266969
	THR	397	-0.239245			THR	397	0.0707457			THR	397	-0.309034			THR	397	-0.687141			THR	397	-0.758126			THR	397	-0.438576			THR	397	-0.505736			THR	397	-0.743786
	LEU	398	0.0889101			LEU	398	-0.0203155			LEU	398	0.162763			LEU	398	0.297323			LEU	398	0.387906			LEU	398	0.375			LEU	398	-0.425908			LEU	398	-0.412524
	PRO	399	0.238289			PRO	399	-0.0277247			PRO	399	0.273184			PRO	399	0.690966			PRO	399	0.619025			PRO	399	0.28131			PRO	399	1.15392			PRO	399	1.31716
	PRO	400	-0.277725			PRO	400	0.0673996			PRO	400	-0.744025			PRO	400	-0.18021			PRO	400	-0.248805			PRO	400	-0.162524			PRO	400	0.301864			PRO	400	-0.109704
	VAL	401	-0.3174			VAL	401	0.119264			VAL	401	-0.307122			VAL	401	-0.71869			VAL	401	-0.78848			VAL	401	-0.383843			VAL	401	-0.713193			VAL	401	-1.26984
	LEU	402	-0.526052			LEU	402	0.140535			LEU	402	-0.451721			LEU	402	-0.335086			LEU	402	-0.354446			LEU	402	-0.0157744			LEU	402	-0.342256			LEU	402	-0.807122
	HIS	403	-0.677581			HIS	403	0.38934			HIS	403	-0.693595			HIS	403	-1.59369			HIS	403	-1.81334			HIS	403	-0.659895			HIS	403	-8.59321			HIS	403	-8.70746
	LEU	404	-1.29804			LEU	404	0.6924			LEU	404	-1.04374			LEU	404	-0.708174			LEU	404	-0.739723			LEU	404	-0.0587954			LEU	404	-0.0552103			LEU	404	-0.457457
	GLN	405	0.508604			GLN	405	-1.21893			GLN	405	-0.268642			GLN	405	-1.85875			GLN	405	-2.26864			GLN	405	-1.65105			GLN	405	-0.977055			GLN	405	-0.123088
	LEU	406	-2.01028			LEU	406	1.56166			LEU	406	-0.804493			LEU	406	-0.140535			LEU	406	-0.310946			LEU	406	0.242591			LEU	406	0.125239			LEU	406	0.190249
	MET	407	-5.46582			MET	407	-8.56262			MET	407	-7.78967			MET	407	-13.0679			MET	407	-7.62118			MET	407	-10.9003			MET	407	-0.0265296			MET	407	0.774379
	ARG	408	19.1083			ARG	408	-1.92686			ARG	408	24.8922			ARG	408	15.3401			ARG	408	19.7758			ARG	408	21.2464			ARG	408	13.5225			ARG	408	16.794
	PHE	409	-8.53418			PHE	409	-10.1888			PHE	409	-21.9536			PHE	409	-7.44312			PHE	409	-10.0607			PHE	409	-11.3083			PHE	409	-0.158461			PHE	409	-0.112811
	ILE	419	-1.34154			MET	410	-0.428776			MET	410	-1.37309			MET	410	-2.36855			MET	410	-1.48972			MET	410	-0.401291			MET	410	0.285612			LYS	420	15.2385
	LYS	420	32.24			TYR	411	0.0681166			TYR	411	2.85253			TYR	411	0.937859			TYR	411	1.17973			TYR	411	1.02916			TYR	411	0.373088			ILE	421	0.0109943
	ILE	421	0.535851			ASP	412	-1.31788			ASP	412	-23.9331			ASP	412	-17.7139			ASP	412	-16.8322			ASP	412	-20.5638			ASP	412	-10.8418			ASN	422	0.0195985
	ASN	422	0.28609			PRO	413	-0.0439771			PRO	413	0.463432			PRO	413	0.620459			PRO	413	0.469646			PRO	413	0.808317			PRO	413	0.220602			ASP	423	-12.6802
	ASP	423	-16.9761			GLN	414	-0.0903442			GLN	414	0.200526			GLN	414	0.0456501			GLN	414	0.258365			GLN	414	0.247849			GLN	414	-0.041587			ARG	424	11.2842
	ARG	424	13.5122			THR	415	-0.0745698			THR	415	-0.711759			THR	415	0.419455			THR	415	-0.186185			THR	415	-0.114006			THR	415	-0.0535373			PHE	425	0.110182
	PHE	425	0.167782			ASP	416	-1.35994			ASP	416	-23.9957			ASP	416	-14.5356			ASP	416	-16.4054			ASP	416	-18.9424			ASP	416	-10.9955			GLU	426	-12.6879
	GLU	426	-13.0973			GLN	417	-0.130258			GLN	417	-0.84847			GLN	417	0.0755258			GLN	417	-0.00310707			GLN	417	-1.21797			GLN	417	-0.190727			PHE	427	0.279398
	PHE	427	0.429015			ASN	418	-4.77629e-16			ASN	418	1.326			ASN	418	1.88002			ASN	418	1.43332			ASN	418	-0.313576			ASN	418	-0.207218			PRO	428	-0.296606
	PRO	428	-0.179015			ILE	419	-0.34608			ILE	419	-1.97992			ILE	419	-0.250239			ILE	419	-0.866396			ILE	419	-0.965344			ILE	419	-0.289675			GLU	429	-13.3987
	GLU	429	-11.613			LYS	420	2.04207			LYS	420	37.2266			LYS	420	8.22729			LYS	420	20.7285			LYS	420	27.9051			LYS	420	12.4627			GLN	430	0.0394359
	GLN	430	-0.243786			ILE	421	-0.149618			ILE	421	0.270554			ILE	421	0.700287			ILE	421	0.0217495			ILE	421	0.251434			ILE	421	0.041109			LEU	431	0.145076
	LEU	431	0.235421			ASN	422	0.17543			ASN	422	0.313815			ASN	422	-0.51673			ASN	422	-0.54087			ASN	422	0.22108			ASN	422	-0.0585564			PRO	432	-0.281788
	PRO	432	-0.195029			ASP	423	-0.767208			ASP	423	-21.5361			ASP	423	-15.4273			ASP	423	-18.0827			ASP	423	-19.2538			ASP	423	-10.82			LEU	433	0.324092
	LEU	433	0.227294			ARG	424	0.326721			ARG	424	15.2156			ARG	424	12.6195			ARG	424	13.7321			ARG	424	13.9957			ARG	424	9.76554			ASP	434	-13.8513
	ASP	434	-10.0593			PHE	425	-0.0370459			PHE	425	0.251195			PHE	425	0.290631			PHE	425	0.31501			PHE	425	0.375956			PHE	425	0.101099			GLU	435	-12.9797
	GLU	435	-10.7433			GLU	426	0.371415			GLU	426	-14.6592			GLU	426	-14.0894			GLU	426	-14.8688			GLU	426	-14.115			GLU	426	-10.8946			PHE	436	-0.188576
	PHE	436	0.0224665			PHE	427	-0.0152964			PHE	427	0.555449			PHE	427	0.439054			PHE	427	0.481119			PHE	427	0.410851			PHE	427	0.188098			LEU	437	0.530593
	LEU	437	0.200526			PRO	428	0.0344168			PRO	428	-0.083652			PRO	428	-0.0867591			PRO	428	-0.103489			PRO	428	0.0117113			PRO	428	-0.212954			GLN	438	0.253824
	GLN	438	0.180688			GLU	429	0.528681			GLU	429	-11.7976			GLU	429	-12.4512			GLU	429	-12.5793			GLU	429	-10.9264			GLU	429	-11.5736			LYS	439	11.4013
	LYS	439	8.56836			GLN	430	0.00191205			GLN	430	-0.11066			GLN	430	-0.349426			GLN	430	-0.359465			GLN	430	-0.197658			GLN	430	0.0587954			THR	440	0.241396
	THR	440	0.190249			LEU	431	-0.0267686			LEU	431	0.273901			LEU	431	0.274618			LEU	431	0.248327			LEU	431	0.228967			LEU	431	0.0327438			ASP	441	-12.7777
	ASP	441	-8.76554			PRO	432	0.0528203			PRO	432	-0.200048			PRO	432	-0.339627			PRO	432	-0.417782			PRO	432	-0.35827			PRO	432	-0.235421			PRO	442	-0.121654
	PRO	442	-0.0504302			LEU	433	-0.0521033			LEU	433	0.207218			LEU	433	0.183078			LEU	433	0.164914			LEU	433	0.0260516			LEU	433	0.124522			LYS	443	11.1649
	LYS	443	7.64388			ASP	434	0.654398			ASP	434	-10.57			ASP	434	-13.2388			ASP	434	-13.6503			ASP	434	-12.0755			ASP	434	-12.9142			ASP	444	-15.4085
	ASP	444	-9.96821			GLU	435	0.615201			GLU	435	-11.6699			GLU	435	-14.0079			GLU	435	-14.7383			GLU	435	-13.8365			GLU	435	-12.0497			PRO	445	-0.507409
	PRO	445	-0.223709			PHE	436	0.0114723			PHE	436	0.0336998			PHE	436	-0.246893			PHE	436	-0.305449			PHE	436	-0.154876			PHE	436	-0.359704			ALA	446	-0.0984704
	ALA	446	-0.162524			LEU	437	-0.041587			LEU	437	0.182839			LEU	437	0.248566			LEU	437	0.299474			LEU	437	0.0327438			LEU	437	0.402964			ASN	447	-0.568595
	ASN	447	-0.318595			GLN	438	-0.0250956			GLN	438	0.315249			GLN	438	0.346319			GLN	438	0.674235			GLN	438	0.327677			GLN	438	0.529637			TYR	448	0.729207
	TYR	448	0.181883			LYS	439	-0.407505			LYS	439	8.80234			LYS	439	11.2297			LYS	439	11.6888			LYS	439	10.5416			LYS	439	11.5127			ILE	449	-0.574809
	ILE	449	-0.414675			THR	440	-0.0102772			THR	440	0.173996			THR	440	0.218929			THR	440	0.237572			THR	440	0.226099			THR	440	0.154159			LEU	450	0.0939293
	LEU	450	0.179254			ASP	441	0.501434			ASP	441	-9.14818			ASP	441	-11.2796			ASP	441	-11.484			ASP	441	-10.0084			ASP	441	-12.4216			HIS	451	-0.15631
	HIS	451	0.164197			PRO	442	0.0126673			PRO	442	0.00191205			PRO	442	-0.408222			PRO	442	-0.0100382			PRO	442	0.0262906			PRO	442	-0.0458891			ALA	452	-0.0353728
	ALA	452	-0.325287			LYS	443	-0.391252			LYS	443	7.60755			LYS	443	9.78489			LYS	443	9.16133			LYS	443	8.68523			LYS	443	11.0951			VAL	453	-0.108031
	VAL	453	-0.539436			ASP	444	0.673279			ASP	444	-10.1936			ASP	444	-12.5554			ASP	444	-12.9359			ASP	444	-10.7075			ASP	444	-14.5055			LEU	454	0.886233
	LEU	454	-0.180449			PRO	445	0.0439771			PRO	445	-0.186663			PRO	445	-0.271989			PRO	445	-0.328155			PRO	445	-0.192161			PRO	445	-0.404876			VAL	455	-0.130736
	VAL	455	-1.31071			ALA	446	0.0172084			ALA	446	-0.165631			ALA	446	-0.122849			ALA	446	-0.133365			ALA	446	-0.110182			ALA	446	0.043738			HIS	456	0.339627
	HIS	456	-0.770554			ASN	447	0.0523423			ASN	447	-0.331979			ASN	447	-0.451482			ASN	447	-0.436902			ASN	447	-0.304971			ASN	447	-0.429254			SER	457	0.177103
	SER	457	-0.724904			TYR	448	-0.0590344			TYR	448	0.195268			TYR	448	0.391013			TYR	448	0.430449			TYR	448	0.21391			TYR	448	0.557839			GLY	458	0.00239006
	GLY	458	-1.12882			ILE	449	0.0724187			ILE	449	-0.373805			ILE	449	-0.453155			ILE	449	-0.433078			ILE	449	-0.236377			ILE	449	-0.383365			ASP	459	-11.7909
	ASP	459	-29.4993			LEU	450	-0.0279637			LEU	450	0.272228			LEU	450	0.238289			LEU	450	0.330306			LEU	450	0.281788			LEU	450	0.00645315			ASN	460	-0.311185
	ASN	460	-1.40774			HIS	451	-0.0205545			HIS	451	-0.250478			HIS	451	-0.126434			HIS	451	-0.0554493			HIS	451	-0.0757648			HIS	451	-0.00143403			HIS	461	-0.190488
	HIS	461	1.67113			ALA	452	0.0564054			ALA	452	-0.44957			ALA	452	-0.323136			ALA	452	-0.405832			ALA	452	-0.290392			ALA	452	0.0317878			GLY	462	-0.103489
	GLY	462	0.188815			VAL	453	-0.0487572			VAL	453	-0.511233			VAL	453	-0.410373			VAL	453	-0.267686			VAL	453	-0.194551			VAL	453	-0.0157744			GLY	463	-0.102294
	GLY	463	0.181644			LEU	454	-0.472992			LEU	454	-1.07959			LEU	454	-0.306883			LEU	454	-0.569073			LEU	454	-0.994742			LEU	454	0.58413			HIS	464	-0.396033
	HIS	464	-0.581979			VAL	455	-0.262667			VAL	455	-1.35851			VAL	455	-0.953394			VAL	455	-0.545411			VAL	455	-0.604685			VAL	455	-0.0336998			TYR	465	0.0081262
	TYR	465	0.523423			HIS	456	-2.62404			HIS	456	-3.19479			HIS	456	1.69097			HIS	456	-3.31501			HIS	456	-2.97443			HIS	456	0.292304			VAL	466	-0.565966
	VAL	466	-0.42304			SER	457	-0.0884321			SER	457	-0.200765			SER	457	0.652486			SER	457	0.34847			SER	457	-0.207696			SER	457	0.141969			VAL	467	0.55282
	VAL	467	0.745937			GLY	458	-0.352294			GLY	458	-1.86138			GLY	458	0.398662			GLY	458	0.0592734			GLY	458	-0.9087			GLY	458	0.101577			TYR	468	-0.358987
	TYR	468	0.0724187			ASP	459	-5.08102			ASP	459	-31.7134			ASP	459	-8.35229			ASP	459	-11.6033			ASP	459	-23.7137			ASP	459	-10.4324			LEU	469	0.65153
	LEU	469	0.533461			ASN	460	-0.739484			ASN	460	-3.82385			ASN	460	-10.7314			ASN	460	-3.29613			ASN	460	-3.53346			ASN	460	0.0750478			ASN	470	-0.494264
	ASN	470	-0.222753			HIS	461	-1.68308			HIS	461	-4.65368			HIS	461	-0.133126			HIS	461	-6.28848			HIS	461	-3.66037			HIS	461	-0.128346			PRO	471	-0.150813
	PRO	471	0.181883			GLY	462	0.389818			GLY	462	1.06358			GLY	462	0.0650096			GLY	462	-0.0616635			GLY	462	0.712237			GLY	462	-0.302103			LYS	472	11.8958
	LYS	472	10.7256			GLY	463	0.349665			GLY	463	1.36544			GLY	463	-0.320507			GLY	463	-0.226577			GLY	463	1.03442			GLY	463	-0.0915392			GLY	473	0.292065
	GLY	473	0.202916			HIS	464	0.124044			HIS	464	-0.98088			HIS	464	-1.32959			HIS	464	-0.943595			HIS	464	-0.590105			HIS	464	-0.149379			ASP	474	-12.3255
	ASP	474	-10.3186			TYR	465	-19.1852			TYR	465	-19.1181			TYR	465	1.04087			TYR	465	-7.85516			TYR	465	-16.3549			TYR	465	0.251673			GLY	475	0.265296
	GLY	475	0.0619025			VAL	466	0.161568			VAL	466	-0.370698			VAL	466	-0.62261			VAL	466	-0.573136			VAL	466	-0.211998			VAL	466	-0.345602			LYS	476	10.0727
	LYS	476	9.29039			VAL	467	-0.0714627			VAL	467	0.591778			VAL	467	0.699331			VAL	467	0.542304			VAL	467	0.304254			VAL	467	0.361855			TRP	477	0.321702
	TRP	477	0.109943			TYR	468	0.114484			TYR	468	0.439771			TYR	468	-0.163719			TYR	468	-0.146511			TYR	468	-0.00167304			TYR	468	-0.344168			CYS	478	-0.0250956
	CYS	478	-0.140535			LEU	469	-0.0666826			LEU	469	0.456023			LEU	469	0.542543			LEU	469	0.472992			LEU	469	0.255019			LEU	469	0.448853			LYS	479	12.0473
	LYS	479	15.1635			ASN	470	-0.0301147			ASN	470	0.507648			ASN	470	-0.244503			ASN	470	0.402008			ASN	470	0.324331			ASN	470	-0.323375			PHE	480	-0.0693117
	PHE	480	-0.655832			PRO	471	0.0327438			PRO	471	0.189771			PRO	471	0.122849			PRO	471	0.000717017			PRO	471	0.0334608			PRO	471	-0.162524			ASP	481	-12.7488
	ASP	481	-16.7976			LYS	472	-0.336281			LYS	472	9.93188			LYS	472	10.2366			LYS	472	10.1711			LYS	472	8.41874			LYS	472	10.8525			ASP	482	-14.0335
	ASP	482	-18.4821			GLY	473	-0.0203155			GLY	473	0.195507			GLY	473	0.215105			GLY	473	0.177581			GLY	473	0.083652			GLY	473	0.22347			ASP	483	-11.5896
	ASP	483	-13.6348			ASP	474	0.373327			ASP	474	-10.3518			ASP	474	-10.842			ASP	474	-10.7285			ASP	474	-9.19073			ASP	474	-10.979			VAL	484	-0.236138
	VAL	484	-0.129063			GLY	475	-0.0298757			GLY	475	0.0621415			GLY	475	0.116157			GLY	475	0.147945			GLY	475	0.0740918			GLY	475	0.250717			VAL	485	0.271272
	VAL	485	0.278681			LYS	476	-0.215105			LYS	476	9.15631			LYS	476	9.37691			LYS	476	9.45053			LYS	476	8.38313			LYS	476	9.42854			SER	486	-0.167543
	SER	486	-0.0712237			TRP	477	-0.0528203			TRP	477	0.149857			TRP	477	0.25			TRP	477	0.304015			TRP	477	0.202677			TRP	477	0.208413			ARG	487	11.0648
	ARG	487	10.4849			CYS	478	-0.0105163			CYS	478	-0.159895			CYS	478	-0.103967			CYS	478	-0.136233			CYS	478	-0.0776769			CYS	478	0.0356119			CYS	488	-0.16826
	CYS	488	-0.0712237			LYS	479	0.378107			LYS	479	15.4596			LYS	479	13.4338			LYS	479	12.7464			LYS	479	12.1513			LYS	479	10.3681			THR	489	-0.39412
	THR	489	-0.310707			PHE	480	-0.0480402			PHE	480	-0.570029			PHE	480	-0.43499			PHE	480	-0.265296			PHE	480	-0.312859			PHE	480	-0.0229446			LYS	490	11.4706
	LYS	490	10.3035			ASP	481	-0.399857			ASP	481	-16.055			ASP	481	-14.2665			ASP	481	-12.7935			ASP	481	-12.0557			ASP	481	-11.0927			GLU	491	-10.9969
	GLU	491	-11.385			ASP	482	-0.0595124			ASP	482	-16.2954			ASP	482	-15.4242			ASP	482	-13.2581			ASP	482	-11.9711			ASP	482	-11.9986			GLU	492	-11.5523
	GLU	492	-13.5294			ASP	483	-0.0939293			ASP	483	-12.6824			ASP	483	-11.8231			ASP	483	-10.7098			ASP	483	-9.77294			ASP	483	-10.4331			ALA	493	-0.364484
	ALA	493	-0.39675			VAL	484	0.0332218			VAL	484	-0.141491			VAL	484	-0.178776			VAL	484	-0.213671			VAL	484	-0.103967			VAL	484	-0.192161			ILE	494	-0.0181644
	ILE	494	-0.329828			VAL	485	-0.0174474			VAL	485	0.202199			VAL	485	0.243308			VAL	485	0.197658			VAL	485	0.124044			VAL	485	0.218929			GLU	495	-11.664
	GLU	495	-12.0263			SER	486	0.0222275			SER	486	-0.121415			SER	486	-0.0368069			SER	486	-0.119981			SER	486	-0.114006			SER	486	-0.11544			HIS	496	-0.240679
	HIS	496	-0.540153			ARG	487	-0.159417			ARG	487	10.4959			ARG	487	10.3059			ARG	487	10.0217			ARG	487	9.01171			ARG	487	9.78848			ASN	497	-0.137189
	ASN	497	-0.435468			CYS	488	0.0248566			CYS	488	-0.0487572			CYS	488	-0.131692			CYS	488	-0.12261			CYS	488	-0.0501912			CYS	488	-0.133843			ASN	512	-0.866635
	ASN	512	-0.488528			THR	489	0.0236616			THR	489	-0.364484			THR	489	-0.408222			THR	489	-0.427581			THR	489	-0.281788			THR	489	-0.260994			ALA	513	-0.364245
	ALA	513	-0.599904			LYS	490	-0.301864			LYS	490	10.673			LYS	490	10.9199			LYS	490	11.006			LYS	490	9.75574			LYS	490	10.1955			TYR	514	-1.19575
	TYR	514	-5.37165			GLU	491	0.0260516			GLU	491	-12.0853			GLU	491	-11.1788			GLU	491	-11.3332			GLU	491	-10.6185			GLU	491	-9.55497			MET	515	-1.11448
	MET	515	0.424235			GLU	492	-0.206979			GLU	492	-13.626			GLU	492	-12.5657			GLU	492	-11.8152			GLU	492	-11.8669			GLU	492	-10.2553			LEU	516	-1.38552
	LEU	516	0.131453			ALA	493	0.0160134			ALA	493	-0.549235			ALA	493	-0.459847			ALA	493	-0.532266			ALA	493	-0.413958			ALA	493	-0.251195			VAL	517	1.0251
	VAL	517	0.564532			ILE	494	-0.0805449			ILE	494	-0.543021			ILE	494	-0.235899			ILE	494	-0.319551			ILE	494	-0.405115			ILE	494	0.0241396			TYR	518	-0.382409
	TYR	518	0.0690727			GLU	495	0.0286807			GLU	495	-13.5533			GLU	495	-11.9374			GLU	495	-12.8953			GLU	495	-11.8207			GLU	495	-10.3262			ILE	519	0.594885
	ILE	519	0.24522			HIS	496	-0.112333			HIS	496	-0.785134			HIS	496	-0.378107			HIS	496	-0.475143			HIS	496	-0.503346			HIS	496	-0.1587			ARG	520	18.4529
	ARG	520	11.4135			ASN	497	-0.138384			ASN	497	-0.975621			ASN	497	-0.43499			ASN	497	-0.707696			ASN	497	-0.782027			ASN	497	-0.0305927
						ASN	512	-0.56979			ASN	512	-2.47992			ASN	512	-1.4804			ASN	512	-2.28872			ASN	512	-1.5294			ASN	512	-0.598709
						ALA	513	-0.0869981			ALA	513	-1.49283			ALA	513	-0.611377			ALA	513	-1.33078			ALA	513	-1.14412			ALA	513	-0.217256
						TYR	514	-1.8934			TYR	514	-5.67304			TYR	514	-6.65249			TYR	514	-4.33556			TYR	514	-3.00287			TYR	514	-0.789436
						MET	515	-0.0628585			MET	515	0.556883			MET	515	0.355163			MET	515	0.632409			MET	515	0.451243			MET	515	-0.0040631
						LEU	516	0.0922562			LEU	516	0.36544			LEU	516	-0.155832			LEU	516	-0.0805449			LEU	516	0.250478			LEU	516	-0.966061
						VAL	517	-0.139101			VAL	517	0.425191			VAL	517	0.587237			VAL	517	0.515774			VAL	517	0.202916			VAL	517	0.582457
						TYR	518	-0.0274857			TYR	518	0.0917782			TYR	518	0.0592734			TYR	518	0.0633365			TYR	518	0.102772			TYR	518	-0.371893
						ILE	519	-0.0293977			ILE	519	0.192639			ILE	519	0.185946			ILE	519	0.181166			ILE	519	0.0255736			ILE	519	0.389818
						ARG	520	-0.950287			ARG	520	11.6666			ARG	520	14.8069			ARG	520	15.2741			ARG	520	12.2665			ARG	520	16.896
